# Supplementary material
Source: HighWire-hosted journal article supplement (https://www.cmaj.ca/highwire/filestream/150536/field_highwire_adjunct_files/1/230816-res-2-at.pdf)
Supplement: 230816-res-2-at.pdf [file 230816-res-2-at.pdf]

**Appendix 2: Two random effects logistic models describing the association between characteristics of patients and physicians being unvaccinated, within the top 10% group, the other 90%\***

|                                   |                         | Top 10th Percentile<br>N=1,890,098 |              |              |        | Rest 90%<br>N=7,786,837 |              |              |        |
|-----------------------------------|-------------------------|------------------------------------|--------------|--------------|--------|-------------------------|--------------|--------------|--------|
| Variable                          | Label                   | Odds Ratio                         | 95% CI Lower | 95% CI Upper | P      | Odds Ratio              | 95% CI Lower | 95% CI Upper | P      |
| Patient age group                 | a. 12-17                | 1.982                              | 1.951        | 2.014        | <.0001 | 2.455                   | 2.433        | 2.479        | <.0001 |
|                                   | b. 18-36                | 1.965                              | 1.940        | 1.989        | <.0001 | 2.603                   | 2.585        | 2.621        | <.0001 |
|                                   | c. 37-65                | 1.319                              | 1.304        | 1.335        | <.0001 | 1.613                   | 1.602        | 1.624        | <.0001 |
|                                   | d. 66+                  | 1.000                              | .            | .            | .      | 1.000                   | .            | .            | .      |
| Patient sex                       | a. Female               | 0.993                              | 0.985        | 1.000        | 0.0556 | 0.953                   | 0.949        | 0.957        | <.0001 |
|                                   | b. Male                 | 1.000                              | .            | .            | .      | 1.000                   | .            | .            | .      |
| Patient Income quintile           | a. [1] Lowest           | 1.662                              | 1.639        | 1.685        | <.0001 | 1.736                   | 1.723        | 1.749        | <.0001 |
|                                   | b. [2]                  | 1.382                              | 1.363        | 1.400        | <.0001 | 1.426                   | 1.416        | 1.436        | <.0001 |
|                                   | c. [3]                  | 1.240                              | 1.224        | 1.257        | <.0001 | 1.265                   | 1.257        | 1.274        | <.0001 |
|                                   | d. [4]                  | 1.120                              | 1.105        | 1.135        | <.0001 | 1.143                   | 1.135        | 1.151        | <.0001 |
|                                   | e. [5] Highest          | 1.000                              | .            | .            | .      | 1.000                   | .            | .            | .      |
| Patient Ethnic Diversity Quintile | a. [1] Lowest           | 1.000                              | .            | .            | .      | 1.000                   | .            | .            | .      |
|                                   | b. [2]                  | 1.046                              | 1.030        | 1.062        | <.0001 | 1.006                   | 0.999        | 1.014        | 0.1056 |
|                                   | c. [3]                  | 1.077                              | 1.059        | 1.095        | <.0001 | 0.988                   | 0.980        | 0.996        | 0.0035 |
|                                   | d. [4]                  | 1.096                              | 1.077        | 1.115        | <.0001 | 1.020                   | 1.011        | 1.029        | <.0001 |
|                                   | e. [5] Highest          | 1.021                              | 1.003        | 1.040        | 0.0230 | 1.025                   | 1.016        | 1.035        | <.0001 |
| Patient Comorbidity (ACG)         | a. No/low comorbidity   | 2.040                              | 2.012        | 2.070        | <.0001 | 1.783                   | 1.768        | 1.797        | <.0001 |
|                                   | b. Moderate comorbidity | 1.088                              | 1.072        | 1.104        | <.0001 | 1.054                   | 1.045        | 1.063        | <.0001 |
|                                   | c. High comorbidity     | 1.000                              | .            | .            | .      | 1.000                   | .            | .            | .      |
| RIO Score Group - Patient         | a. Urban                | 1.000                              | .            | .            | .      | 1.000                   | .            | .            | .      |

|                             |               |       |       |       |        |       |       |       |        |
|-----------------------------|---------------|-------|-------|-------|--------|-------|-------|-------|--------|
|                             | b. Small town | 1.237 | 1.218 | 1.256 | <.0001 | 1.261 | 1.251 | 1.271 | <.0001 |
|                             | c. Rural      | 1.511 | 1.469 | 1.554 | <.0001 | 1.480 | 1.462 | 1.499 | <.0001 |
| Immigrated in last 10 years | a. Yes        | 0.966 | 0.952 | 0.979 | <.0001 | 1.003 | 0.992 | 1.014 | 0.5767 |
|                             | b. No         | 1.000 | .     | .     | .      | 1.000 | .     | .     | .      |
| Physician age group         | a. <45        | 1.000 | .     | .     | .      | 1.000 | .     | .     | .      |
|                             | b. 45-64      | 1.080 | 1.007 | 1.158 | 0.0308 | 1.078 | 1.058 | 1.098 | <.0001 |
|                             | c. 65-74      | 1.131 | 1.032 | 1.240 | 0.0084 | 1.126 | 1.094 | 1.158 | <.0001 |
|                             | d. 75+        | 1.457 | 1.115 | 1.904 | 0.0058 | 1.419 | 1.348 | 1.495 | <.0001 |
| Physician sex               | a. Female     | 0.952 | 0.899 | 1.008 | 0.0930 | 0.909 | 0.894 | 0.925 | <.0001 |
|                             | b. Male       | 1.000 | .     | .     | .      | 1.000 | .     | .     | .      |
| Enrolment model             | a. CAP        | 1.000 | .     | .     | .      | 1.000 | .     | .     | .      |
|                             | b. FHT        | 0.899 | 0.830 | 0.973 | 0.0086 | 0.974 | 0.955 | 0.994 | 0.0102 |
|                             | c. OGP        | 0.687 | 0.488 | 0.966 | 0.0309 | 0.947 | 0.873 | 1.028 | 0.1920 |
|                             | d. EFS        | 1.018 | 0.954 | 1.086 | 0.5880 | 1.195 | 1.170 | 1.221 | <.0001 |

ACG= Adjusted clinical group

\*3 separate models “10<sup>th</sup> percentile”, “Rest 90<sup>th</sup>”, and “Total” were conducted for assessing the variables associated with unvaccinated patients adjusted for all the other variables
